# Supplementary material for: Relationships Between Basic Psychological Need Satisfaction, Regulations, and Behavioral Engagement in Mathematics
Source: Frontiers journal article supplement (doi:10.3389/fpsyg.2022.829958), 2022-04-12
Supplement: Table_1.pdf [file Table_1.pdf]

**Supplementary Table 1.** Items Used to Assess Basic Psychological Needs, Regulations, and Behavioral Engagement

| Construct                | Label | Full item (translated into English)                                                                                |
|--------------------------|-------|--------------------------------------------------------------------------------------------------------------------|
| Basic Psychological Need |       |                                                                                                                    |
| Competence               | c2    | I feel that I can perform well in mathematics.                                                                     |
| Competence               | c3    | I believe I can become as good as I want in mathematics.                                                           |
| Competence               | c4    | I am sure I will be able to understand what we work with in the math lessons.                                      |
| Relatedness              | r1    | I feel that my teacher cares about me.                                                                             |
| Relatedness              | r2    | My teacher makes an effort to make me feel good.                                                                   |
| Relatedness              | r3    | My teacher thinks I am important.                                                                                  |
| Autonomy                 | a2    | If I would tell my teacher what I would like to do on the next math lesson, there is a big chance we will do that. |
| Autonomy                 | a3    | My teacher would think that it was good if I suggested what we could do on the math lessons.                       |
| Autonomy                 | a4    | I am allowed to participate in decision making during math lessons.                                                |
| Regulation               |       | Stem: When I work with math during lessons, I do it because...                                                     |
| External                 | ext1  | ...I want to avoid people nagging at me.                                                                           |
| External                 | ext3  | ...I do not want the teacher to get angry with me.                                                                 |
| Introjected              | itj1  | ...I want the teacher to think I'm a good student.                                                                 |
| Introjected              | itj2  | ...I do not want my teacher to get disappointed with me.                                                           |
| Identified               | ide1  | ...it is important to me to get better at mathematics.                                                             |
| Identified               | ide2  | ...it is important to me to learn new things.                                                                      |
| Identified               | ide3  | ...it is important to me to understand mathematics.                                                                |
| Intrinsic                | int1  | ...it is fun.                                                                                                      |
| Intrinsic                | int2  | ...I like to work with math.                                                                                       |
| Intrinsic                | int3  | ...I think math is interesting.                                                                                    |
| Behavioral Engagement    | b2    | During math lessons I think about what I should learn all the time.                                                |
| Behavioral Engagement    | b3    | I always try to learn as much as possible during the math lessons.                                                 |
| Behavioral Engagement    | b4    | I use all time during lessons to work with math.                                                                   |
