# Supplementary material for: Relationships Between Basic Psychological Need Satisfaction, Regulations, and Behavioral Engagement in Mathematics
Source: Frontiers journal article supplement (doi:10.3389/fpsyg.2022.829958), 2022-04-12
Supplement: Table_3.pdf [file Table_3.pdf]

**Supplementary Table 3.** Standardized Path Coefficients for Latent Variables in the Final SEM-Model

| Relation                  | Estimate | <i>SE</i> | <i>p</i> |
|---------------------------|----------|-----------|----------|
| Engagement on:            |          |           |          |
| Controlled regulation     | 0.032    | 0.023     | 0.159    |
| Identified regulation     | 0.535    | 0.041     | 0.000    |
| Intrinsic regulation      | 0.068    | 0.040     | 0.089    |
| Perceived competence      | 0.326    | 0.055     | 0.000    |
| Perceived autonomy        | 0.042    | 0.041     | 0.307    |
| Perceived relatedness     | 0.010    | 0.048     | 0.828    |
| Controlled regulation on: |          |           |          |
| Perceived competence      | -0.231   | 0.038     | 0.000    |
| Perceived autonomy        | 0.193    | 0.048     | 0.000    |
| Perceived relatedness     | -0.054   | 0.047     | 0.249    |
| Identified regulation on: |          |           |          |
| Perceived competence      | 0.503    | 0.045     | 0.000    |
| Perceived autonomy        | 0.030    | 0.054     | 0.570    |
| Perceived relatedness     | 0.167    | 0.060     | 0.006    |
| Intrinsic regulation on:  |          |           |          |
| Perceived competence      | 0.563    | 0.030     | 0.000    |
| Perceived autonomy        | 0.223    | 0.047     | 0.000    |
| Perceived relatedness     | -0.051   | 0.044     | 0.239    |

*Note:* *SE* = standard error
